# Supplementary material for: Microevolution of Nematode miRNAs Reveals Diverse Modes of Selection
Source: PubMed Central journal article supplement (PMC4255771; doi:10.1093/gbe/evu239), 2014-10-28
Supplement: supp_evu239_RJ_mirvar_SuppMat_100214.pdf [file supp_evu239_RJ_mirvar_SuppMat_100214.pdf]

Supplementary Material for:

Richard Jovelin and Asher D. Cutter

Microevolution of nematode miRNAs reveals diverse modes of selection

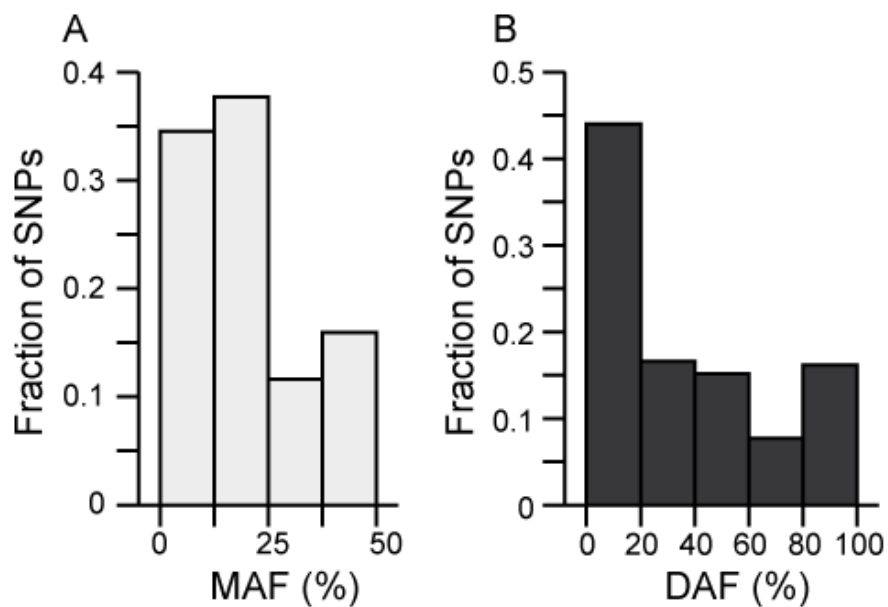

**Supplementary Figure 1.** The skewed distributions of minor allele frequencies (MAF; A) and derived allele frequencies (DAF; B) are consistent with the action of purifying selection on miRNAs.

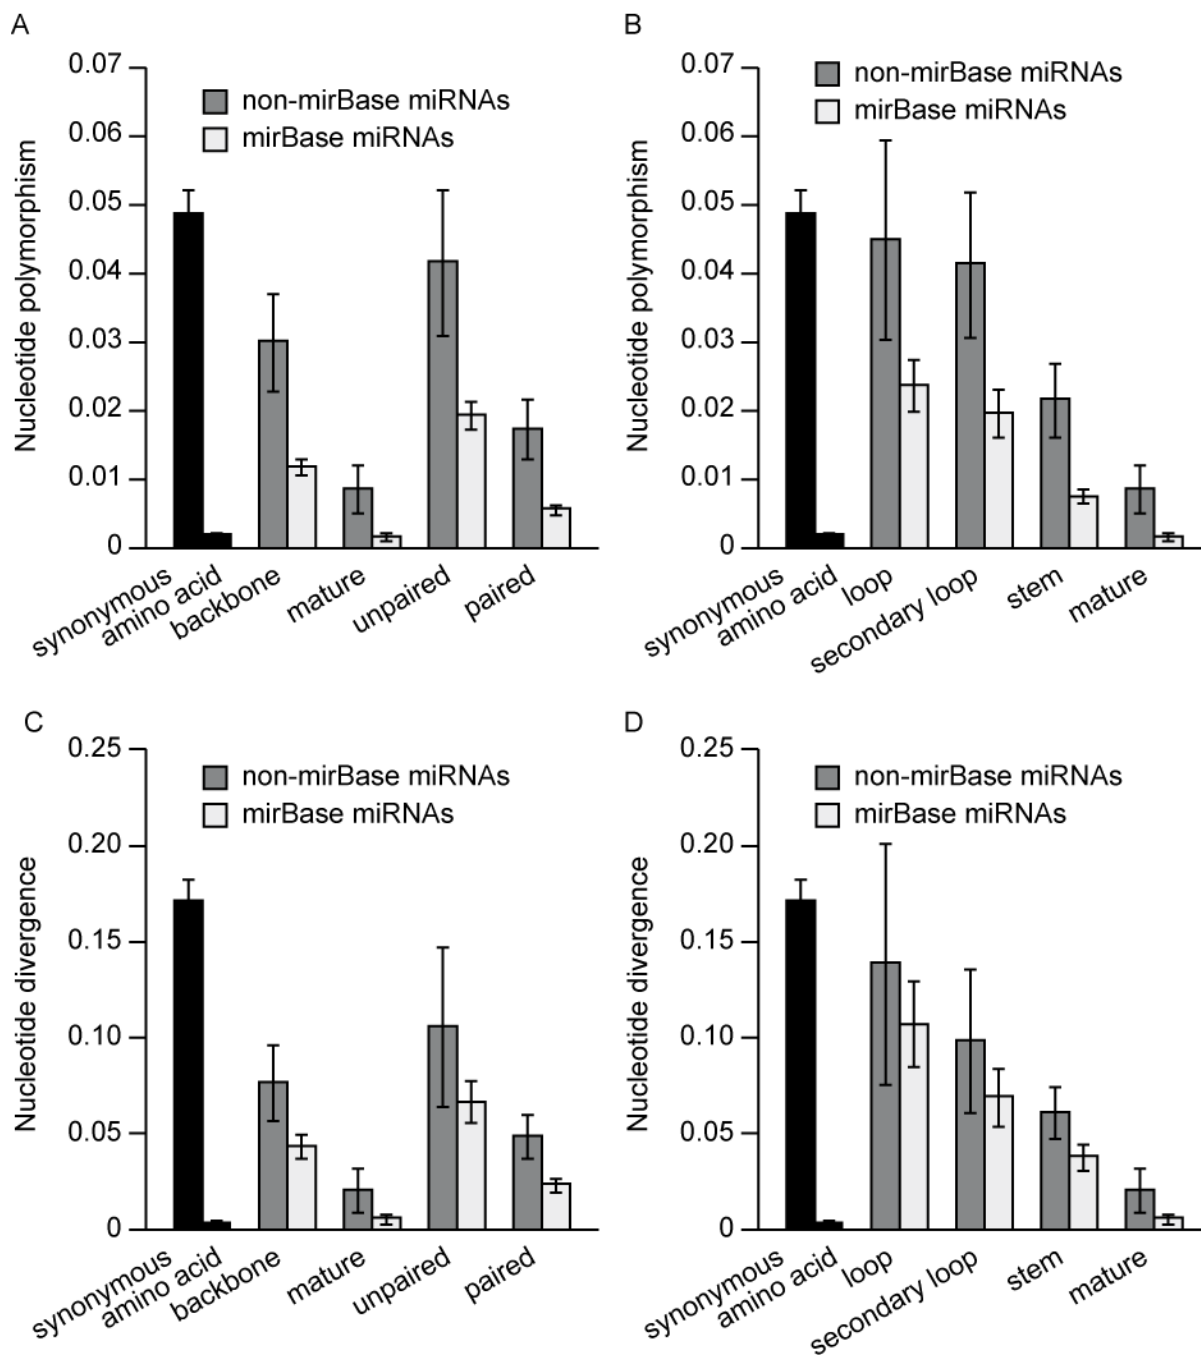

**Supplementary Figure 2.** Non-mirBase miRNAs show signatures of purifying selection. Although non-mirBase miRNAs are more diverse than mirBase miRNAs, they show similar patterns of selective constraints on different portions of the miRNA hairpins for polymorphism within *C. remanei* (A, B) and divergence between *C. remanei* and *C. latens* (C, D).

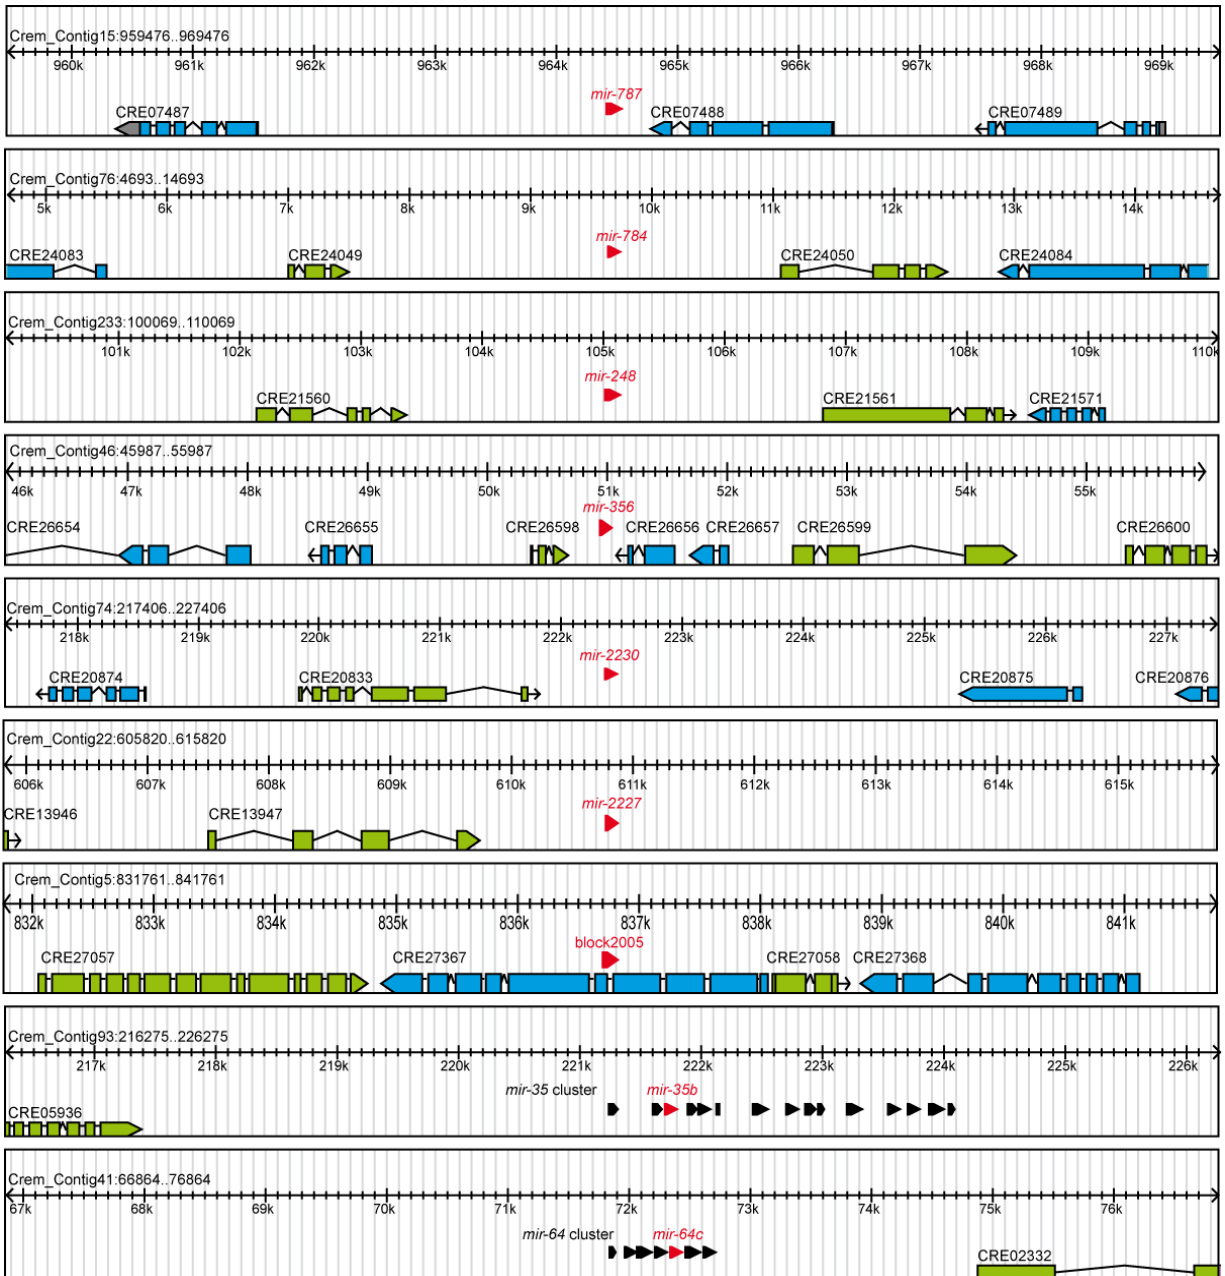

**Supplementary Figure 3.** Genomic context of miRNAs with signatures of positive selection (in red).

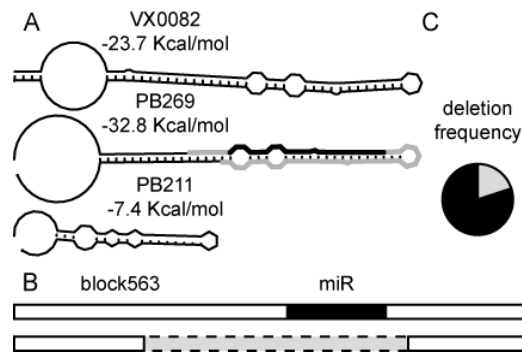

**Supplementary Figure 4.** miRNA deletion polymorphism within population. A 59 bp-long deletion (grey) removes the entire mature sequence (black), the loop nucleotides and the miR\* in miRNA block563, resulting in a short and unstable hairpin (A and B). The deletion is present in 2 of 10 strains sampled (20%) in the population of *C. remanei* from Ohio.

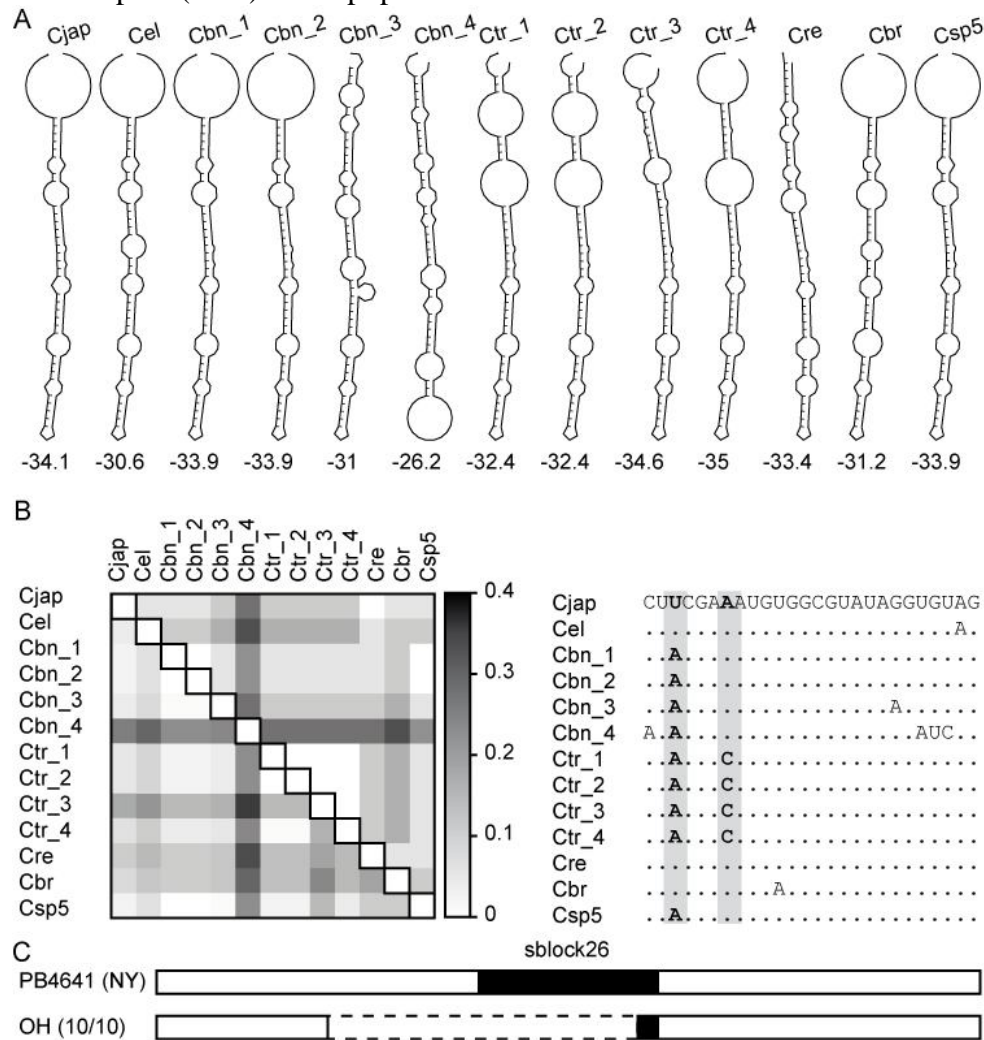

**Supplementary Figure 5.** miRNA deletion polymorphism among populations of *C. remanei*. A. miRNA sblock26 is conserved across *Caenorhabditis* species. B. The hairpin sequences (below

diagonal) and the mature sequences (above diagonal) of homologs are overall well conserved, but substitutions in the seed motif predict functional divergence. C. A 201 bp-long deletion removing 89 % of the hairpin sequence, including the miR, is present in all strains sampled from the population of *C. remanei* from Ohio. *Cjap*: *C. japonica*; *Cel*: *C. elegans*; *Cbn*: *C. brenneri*; *Ctr*: *C. tropicalis*; *Cre*: *C. remanei*; *Cbr*: *C. briggsae*

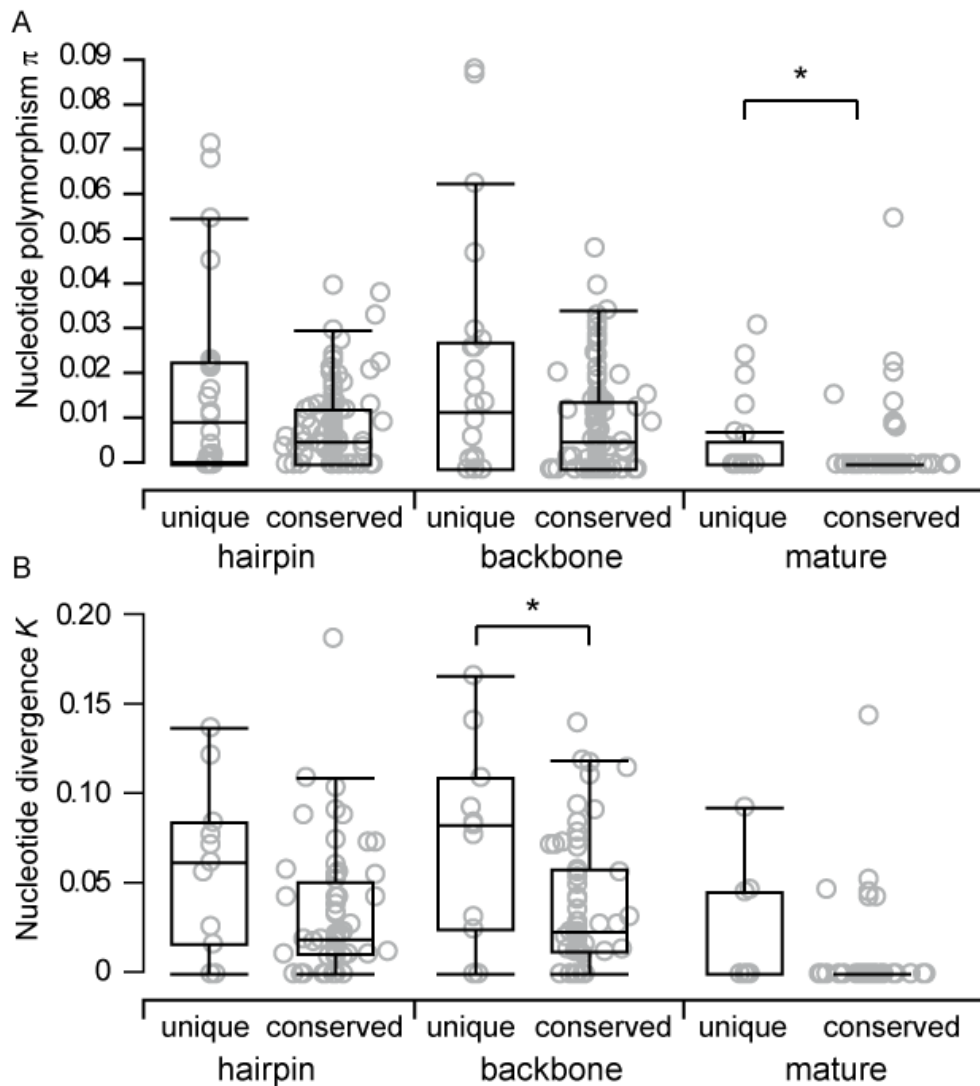

**Supplementary Figure 6.** miRNAs from families unique to *C. remanei* and *C. latens* have more polymorphisms (A) and divergence (B) than miRNAs from families conserved in other *Caenorhabditis* species.

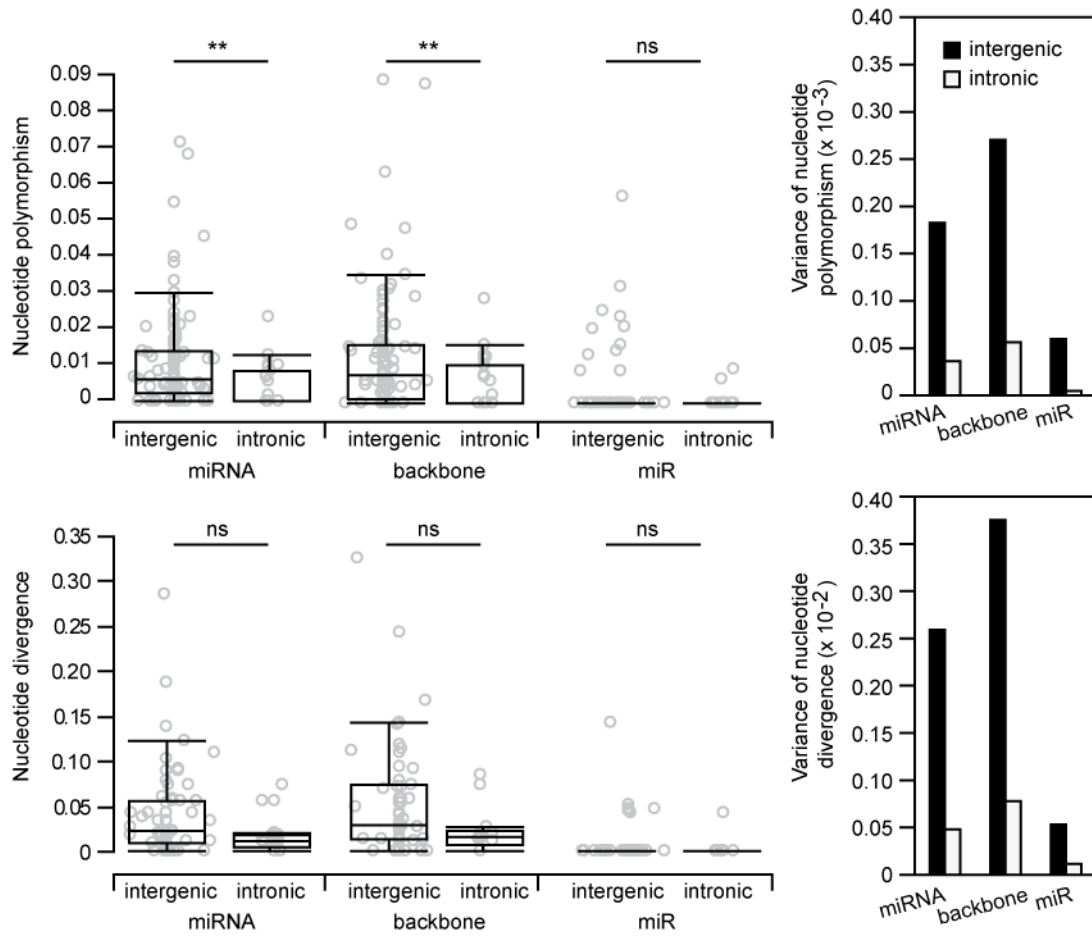

**Supplementary Figure 7.** Intronic miRNAs are more conserved and have lower variance in nucleotide diversity than intergenic miRNAs. Top: polymorphism within the Ohio population of *C. remanei*. Bottom: Divergence between *C. remanei* and *C. latens*. \*\*  $P < 0.01$ . ns: non-significant

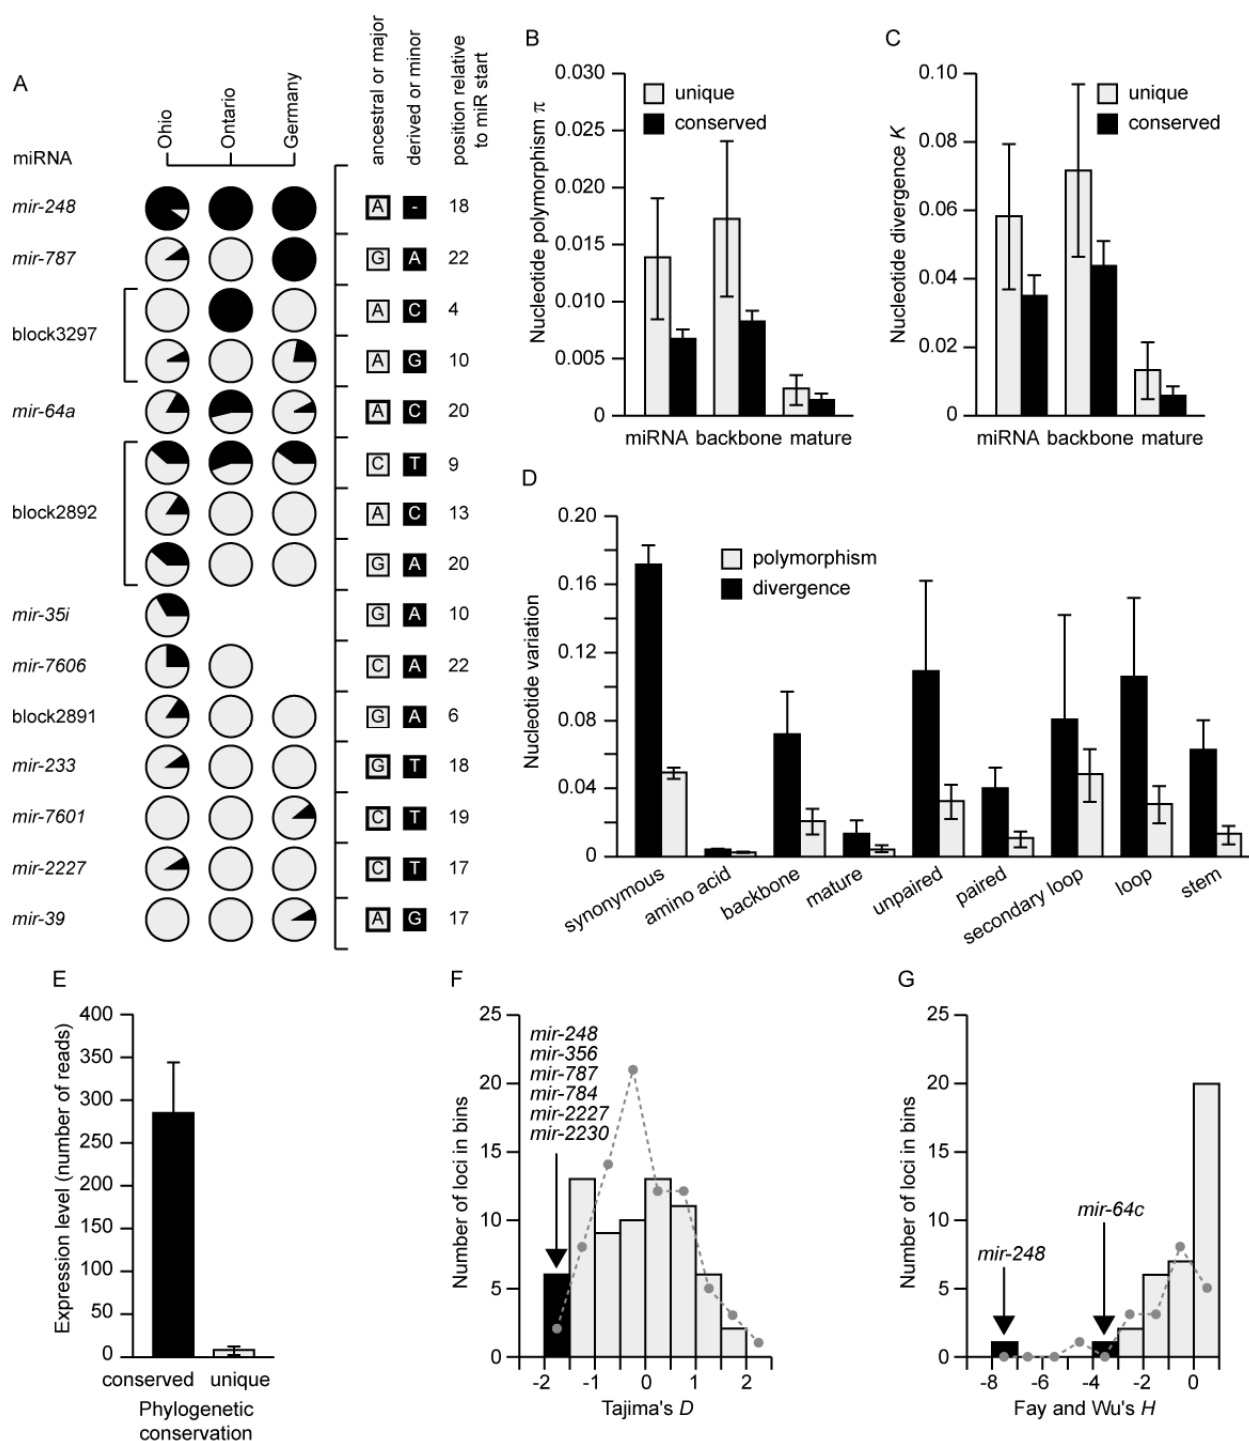

**Supplementary Figure 8.** Patterns of nucleotide variation after removing 21 miRNAs with unusual amount of polymorphism are similar to the full miRNA dataset, showing that our general conclusions are robust to the sampling scheme. **A.** SNP frequencies in mature miRNAs among populations of *C. remanei*. Columns represent separate populations and rows represent distinct SNPs. Each circle represents the frequencies of the ancestral or major allele (in grey) and the derived or minor allele (in black). The different alleles and their position relative the start of

the mature miR are indicated in the right panels. Ancestral alleles identified by comparison with *C. latens* are marked with a thick line. SNPs located in a same miRNA are joined by a horizontal bar. B, C. miRNAs from families unique to *C. remanei* and *C. latens* evolve faster than miRNAs from families conserved in other *Caenorhabditis* species. D. Nevertheless, young miRNAs show pervasive signatures of purifying selection. E. Young miRNAs are expressed at lower level than phylogenetically conserved miRNAs. F, G. Non-neutral pattern of sequence variation in miRNA hairpins. miRNAs with site frequency spectrum deviating from neutral expectations with Tajima's  $D$  (F) and Fay and Wu's  $H$  (G) are labeled in black, and miRNAs with SFS compatible with neutrality are labeled in grey. Note that these tests remain significant only for *mir-248* ( $H < 0$ ) after correction for multiple-testing. The distributions of  $D$  and  $H$  for protein-coding genes are shown for comparison with dashed lines.



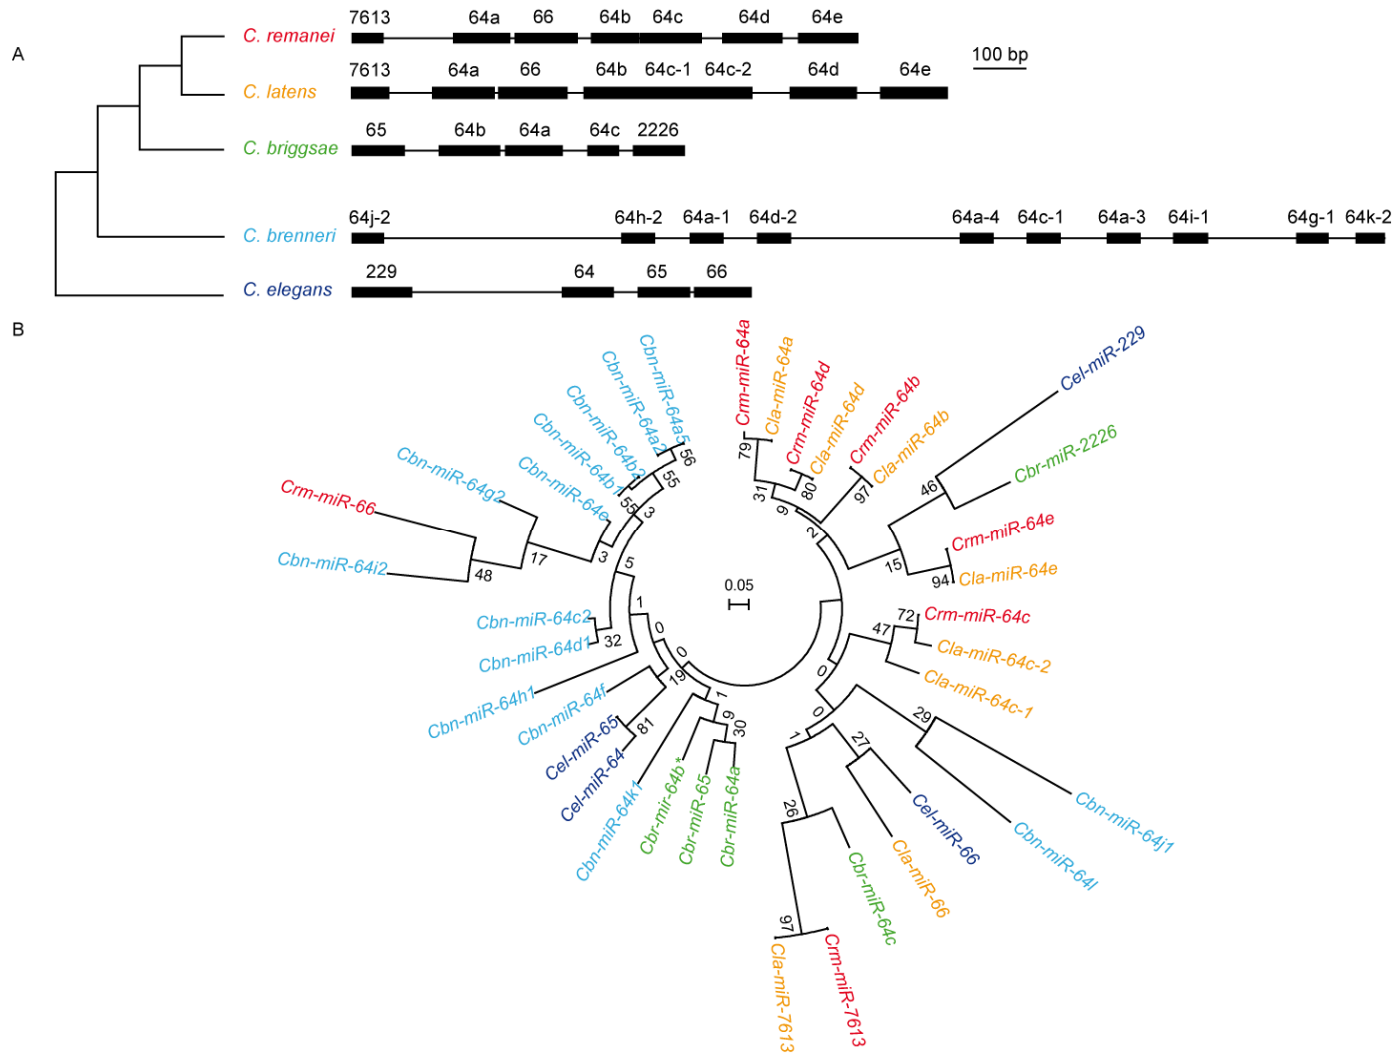

**Supplementary Figure 9.** A. The *mir-64* cluster has evolved by species-specific tandem duplications and/or miRNA losses. A. Structure of the *mir-64* cluster in five *Caenorhabditis* species. B. Phylogenetic relationships of the *mir-64* mature sequences. Numbers at each node indicate percent bootstrap support. *Crem*: *C. remanei*; *Cla*: *C. latens*

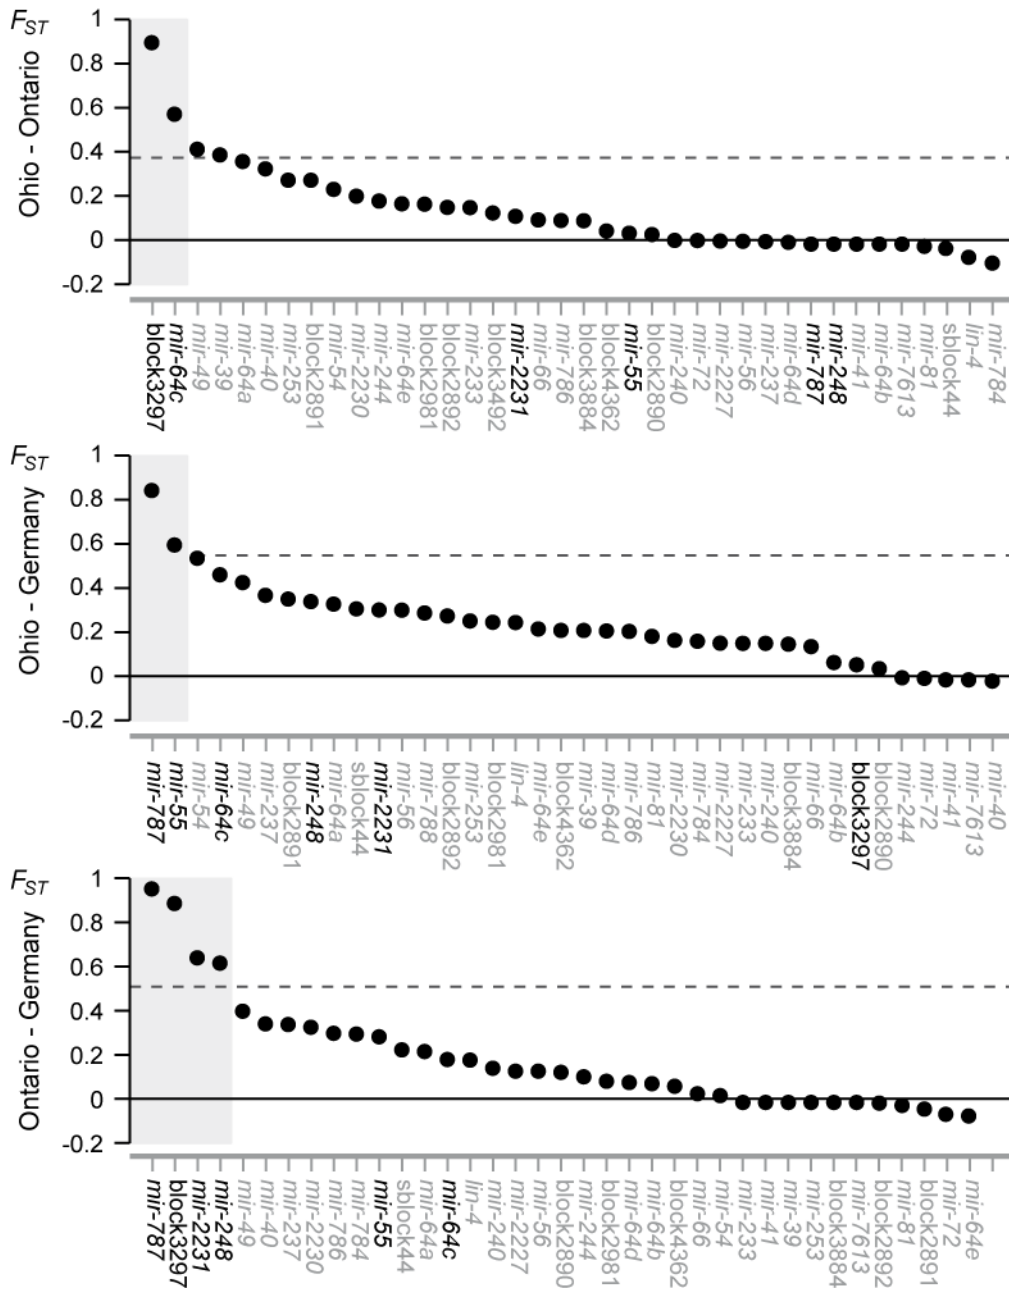

**Supplementary Figure 10.** Genetic differentiation of miRNAs between three populations of *C. remanei*. Each panel indicates the distribution of  $F_{ST}$  values between pairs of populations. Dots represent  $F_{ST}$  values measured with all polymorphisms located in the miRNA hairpin. The dashed lines represent 95<sup>th</sup> percentile of the empirical distribution of  $F_{ST}$  values in 20 re-sequenced protein-coding genes.

**Supplementary Table 1.** Summary statistics of nucleotide variation at miRNA loci in three populations of *C. remanei* and in *C. latens*.

|          |                  | N <sup>a</sup> | n <sup>b</sup> | L <sup>c</sup> | P <sup>d</sup> | S <sup>e</sup> | $\pi$ <sup>f</sup> |
|----------|------------------|----------------|----------------|----------------|----------------|----------------|--------------------|
| Flanking | OH <sup>g</sup>  | 209            | 10             | 183.4306       | 8.5024         | 1777           | 0.0179             |
|          | ON <sup>h</sup>  | 44             | 9              | 202.7955       | 7.4773         | 329            | 0.0211             |
|          | GER <sup>i</sup> | 47             | 10             | 193.9787       | 6.6383         | 312            | 0.0219             |
|          | <i>C. latens</i> | 97             | 2              | 190.4227       | 3.1031         | 301            | 0.0166             |
| Hairpin  | OH <sup>g</sup>  | 129            | 10             | 103.0310       | 2.9535         | 381            | 0.0095             |
|          | ON <sup>h</sup>  | 38             | 9              | 104.3421       | 3.9737         | 151            | 0.0144             |
|          | GER <sup>i</sup> | 38             | 10             | 104.0526       | 4.0263         | 153            | 0.0150             |
|          | <i>C. latens</i> | 65             | 2              | 103.6154       | 1              | 65             | 0.0079             |
| Backbone | OH <sup>g</sup>  | 129            | 10             | 80.9690        | 2.8217         | 364            | 0.0115             |
|          | ON <sup>h</sup>  | 38             | 9              | 82.1842        | 3.8421         | 146            | 0.0177             |
|          | GER <sup>i</sup> | 38             | 10             | 81.8421        | 3.8158         | 145            | 0.0181             |
|          | <i>C. latens</i> | 65             | 2              | 81.1077        | 0.9538         | 62             | 0.0098             |
| Mature   | OH <sup>g</sup>  | 129            | 10             | 22.0620        | 0.1318         | 17             | 0.0020             |
|          | ON <sup>h</sup>  | 38             | 9              | 22.1579        | 0.1316         | 5              | 0.0024             |
|          | GER <sup>i</sup> | 38             | 10             | 22.2110        | 0.2105         | 8              | 0.0033             |
|          | <i>C. latens</i> | 65             | 2              | 22.5077        | 0.0462         | 3              | 0.0011             |
| Star     | OH <sup>g</sup>  | 39             | 10             | 21.6154        | 0.2308         | 9              | 0.0028             |
|          | ON <sup>h</sup>  | 15             | 9              | 21.7333        | 0.4            | 6              | 0.0062             |
|          | GER <sup>i</sup> | 15             | 10             | 21.6667        | 0.5333         | 8              | 0.0082             |
|          | <i>C. latens</i> | 28             | 2              | 21.75          | 0.0357         | 1              | 0.0005             |

<sup>g</sup>OH: Ohio; <sup>h</sup>ON: Ontario; <sup>i</sup>GER: Germany. <sup>a</sup>N: number of loci; <sup>b</sup>n: median number of strains; <sup>c</sup>L: average length; <sup>d</sup>P: average number of segregating sites; <sup>e</sup>S: total number of segregating sites per locus; <sup>f</sup> $\pi$ : average nucleotide diversity per locus.

**Supplementary Table 2.** Selective constraints are stronger for amino-acid replacement sites in protein-coding genes than for mature miRNAs.

| Sites                 | Within species nucleotide variation |                    |       |        | Between species nucleotide variation |                  |       |        |
|-----------------------|-------------------------------------|--------------------|-------|--------|--------------------------------------|------------------|-------|--------|
|                       | N <sup>a</sup>                      | $\pi$ <sup>b</sup> | vs AA | vs Syn | N <sup>a</sup>                       | $K$ <sup>c</sup> | vs AA | vs Syn |
| AA <sup>d</sup>       | 78                                  | 0.0015 ± 0.0002    | NA    | ***    | 20                                   | 0.0036 ± 0.0008  | NA    | ***    |
| Syn <sup>e</sup>      | 78                                  | 0.0393 ± 0.0030    | ***   | NA     | 20                                   | 0.1593 ± 0.0105  | ***   | NA     |
| flanking <sup>f</sup> | 209                                 | 0.0179 ± 0.0011    | ***   | ***    | 133                                  | 0.0822 ± 0.0069  | ***   | ***    |
| miRNA                 | 129                                 | 0.0095 ± 0.0011    | ***   | ***    | 79                                   | 0.0380 ± 0.0052  | ***   | ***    |
| backbone <sup>g</sup> | 129                                 | 0.0115 ± 0.0014    | ***   | ***    | 79                                   | 0.0474 ± 0.0063  | ***   | ***    |
| miR <sup>h</sup>      | 129                                 | 0.0020 ± 0.0006    | ***   | ***    | 79                                   | 0.0070 ± 0.0025  | ***   | ***    |
| miR* <sup>i</sup>     | 39                                  | 0.0028 ± 0.0011    | ***   | ***    | 29                                   | 0.0032 ± 0.0022  | ***   | ***    |

Comparison of mean nucleotide polymorphism with the *C. remanei* population of Ohio and mean sequence divergence between nonsynonymous and synonymous sites with various site categories in miRNAs. Means are represented ± 1 standard error (SEM). <sup>a</sup>N: number of loci; <sup>b</sup> $\pi$ : nucleotide diversity, <sup>c</sup> $K$ : nucleotide divergence, <sup>d</sup>AA: amino acid replacement sites; <sup>e</sup>Syn: synonymous sites; <sup>f</sup>flanking: miRNA-flanking regions; <sup>g</sup>miR: mature sequence; <sup>h</sup>miR\*: star sequence; NS: not significant; NA: not applicable. \*\*\*  $P < 0.001$ .

**Supplementary Table 3.** Comparison of nucleotide polymorphism in the *C. remanei* population of Ontario between nonsynonymous and synonymous sites with various miRNA site categories.

| Sites                 | Within species nucleotide variation |                          |        |         |
|-----------------------|-------------------------------------|--------------------------|--------|---------|
|                       | N <sup>a</sup>                      | $\pi^b$ (mean $\pm$ SEM) | vs. AA | vs. Syn |
| AA <sup>c</sup>       | 19                                  | 0.0008 $\pm$ 0.0003      | NA     | ***     |
| Syn <sup>d</sup>      | 19                                  | 0.0368 $\pm$ 0.0063      | ***    | NA      |
| flanking <sup>e</sup> | 44                                  | 0.0211 $\pm$ 0.0028      | ***    | *       |
| miRNA                 | 38                                  | 0.0144 $\pm$ 0.0023      | ***    | ***     |
| backbone <sup>f</sup> | 38                                  | 0.0177 $\pm$ 0.0029      | ***    | **      |
| miR <sup>g</sup>      | 38                                  | 0.0024 $\pm$ 0.0014      | ***    | ***     |
| miR* <sup>h</sup>     | 15                                  | 0.0062 $\pm$ 0.0031      | NS     | ***     |

<sup>a</sup>N: number of loci; <sup>b</sup> $\pi$ : nucleotide diversity; <sup>c</sup>AA: amino acid replacement sites; <sup>d</sup>Syn: synonymous sites; <sup>e</sup>flanking: miRNA-flanking regions; <sup>f</sup>miR: mature sequence; <sup>g</sup>backbone: miRNA minus miR; <sup>h</sup>miR\*: star sequence; NS: not significant; NA: not applicable. \*  $P < 0.5$ , \*\*  $P < 0.01$ , \*\*\*  $P < 0.001$ .

**Supplementary Table 4.** Comparison of nucleotide polymorphism in the *C. remanei* population of Germany between nonsynonymous and synonymous sites with various miRNA site categories.

| Sites                 | Within species nucleotide variation |                          |       |        |
|-----------------------|-------------------------------------|--------------------------|-------|--------|
|                       | N <sup>a</sup>                      | $\pi^b$ (mean $\pm$ SEM) | vs AA | vs Syn |
| AA <sup>c</sup>       | 19                                  | 0.0006 $\pm$ 0.0002      | NA    | ***    |
| Syn <sup>d</sup>      | 19                                  | 0.0269 $\pm$ 0.0034      | ***   | NA     |
| flanking <sup>e</sup> | 47                                  | 0.0219 $\pm$ 0.0035      | ***   | NS     |
| miRNA                 | 38                                  | 0.0150 $\pm$ 0.0028      | ***   | **     |
| backbone <sup>f</sup> | 38                                  | 0.0181 $\pm$ 0.0035      | ***   | *      |
| miR <sup>g</sup>      | 38                                  | 0.0033 $\pm$ 0.0017      | *     | ***    |
| miR* <sup>h</sup>     | 15                                  | 0.0082 $\pm$ 0.0036      | NS    | ***    |

<sup>a</sup>N: number of loci; <sup>b</sup> $\pi$ : nucleotide diversity; <sup>c</sup>AA: amino acid replacement sites; <sup>d</sup>Syn: synonymous sites; <sup>e</sup>flanking: miRNA-flanking regions; <sup>f</sup>miR: mature sequence; <sup>g</sup>backbone: miRNA minus miR; <sup>h</sup>miR\*: star sequence; NS: not significant; NA: not applicable. \*  $P < 0.5$ , \*\*  $P < 0.01$ , \*\*\*  $P < 0.001$ .

**Supplementary Table 5.** Homologs of miRNAs with signatures of adaptive selection in *C. remanei* regulate target genes involved in gonad formation in *C. elegans*. Only the cluster of functionally enriched genes with the highest score is shown for each miRNA.

| miRNA          | Cluster score | Enrichment                                         | N  | <i>P</i>  | <i>P</i> -corrected |
|----------------|---------------|----------------------------------------------------|----|-----------|---------------------|
| <i>mir-787</i> | 5.23          | sex differentiation                                | 73 | 0.0000012 | 0.0011              |
|                |               | genitalia development                              | 65 | 0.0000085 | 0.004               |
|                |               | reproductive development process                   | 74 | 0.0000095 | 0.003               |
|                |               | hermaphrodite genitalia development                | 64 | 0.000013  | 0.003               |
| <i>mir-784</i> | 3.4           | hermaphrodite genitalia development                | 54 | 0.00025   | 0.21                |
|                |               | genitalia development                              | 54 | 0.0003    | 0.091               |
|                |               | reproductive development                           | 61 | 0.00049   | 0.088               |
|                |               | sex differentiation                                | 57 | 0.00067   | 0.086               |
| <i>mir-356</i> | 3.71          | development of primary sexual characteristics      | 32 | 0.00012   | 0.042               |
|                |               | gonad development                                  | 30 | 0.00022   | 0.039               |
|                |               | reproductive structure development                 | 30 | 0.00027   | 0.042               |
| <i>mir-248</i> | 3.93          | reproductive developmental process                 | 98 | 0.000033  | 0.018               |
|                |               | hermaphrodite genitalia development                | 83 | 0.000079  | 0.028               |
|                |               | genitalia development                              | 83 | 0.0001    | 0.028               |
|                |               | sex differentiation                                | 86 | 0.00072   | 0.076               |
| <i>mir-64</i>  | 3.24          | development of primary male sexual characteristics | 6  | 0.0004    | 0.38                |
|                |               | male sex differentiation                           | 6  | 0.0004    | 0.38                |
|                |               | male genitalia development                         | 5  | 0.0012    | 0.21                |
| <i>mir-35</i>  | 4.03          | cell motion                                        | 13 | 0.000042  | 0.03                |
|                |               | cell migration                                     | 11 | 0.000071  | 0.025               |
|                |               | cell motility                                      | 11 | 0.00016   | 0.022               |
|                |               | localization of cell                               | 11 | 0.00016   | 0.022               |

N: number of target genes, *P*-corrected: *P* value after Benjamini correction
